# Supplementary material for: Maize adaptation across temperate climates was obtained via expression of two florigen genes
Source: PLoS Genet. 2020 Jul 16;16(7):e1008882. doi: 10.1371/journal.pgen.1008882 (PMC7386623; doi:10.1371/journal.pgen.1008882)
Supplement: S1 Table — Genotypic and residual variance components were estimated with the mixed-model fitted per experiment accounting for fixed replicate effect, random variety and spatial effects and spatially correlated errors. They were used to estimate an interval of broad-sense heritability such as H2low = varG/(varG + varRes/n) and H2high = varG/(varG + varRes/n + varSpatial), with varG the genotypic variance, varRes the residual variance and varSpatial the spatial variance. Mean values were calculated using BLUEs estimated with the same mixed model but with variety in fixed effect. The same BLUEs were used to estimate narrow sense heritability with a model assuming additive SNP-effects. Units are as follow: anthesis and silking in thermal time (days at 20°C), transcript accumulation in -ΔCt. (XLSX) [file pgen.1008882.s013.xlsx]

## Sheet: table H2
Trait	Experiment	Mean	Narrow sense heritability (h2)	Variance		Broad sense heritability low (H2low)	Broad sense heritability high (H2high)
				Genotypic	Residual
Flowering related traits
Anthesis	Platform 2014	71.5962	0.795023	43.053	9.12589	0.949675	0.949675
Silking	Platform 2014	75.4179	0.65623	58.7797	21.1676	0.917407	0.917407
Leaf number	Platform 2014	17.8682	0.790174	2.75378	0.536935	0.95352	0.95352
Anthesis	Platform 2015	74.2449	0.798426	46.9068	7.17032	0.963191	0.963191
Silking	Platform 2015	75.8135	0.646282	41.8973	9.43957	0.946678	0.946678
Leaf number	Platform 2015	18.8318	0.750439	2.97626	0.360206	0.970632	0.970632
Anthesis	Field 2015	65.7681	0.911854	31.0336	3.47812	0.946936	0.946936
Silking	Field 2015	67.2184	0.872915	33.8705	3.85759	0.946122	0.946122
Leaf number	Field 2015	17.348	0.794845	3.00408	0.612974	0.907422	0.907422
Anthesis	Field 2016	64.1121	0.800221	27.1795	2.03746	0.963873	0.963873
Silking	Field 2016	65.4951	0.849543	32.6727	2.56711	0.9622	0.9622
Leaf number	Field 2016	17.4482	0.833874	2.50481	0.32282	0.939461	0.939461
Florigenes expression
ZCN8 leaf 7	Platform 2014	-1.4574	0.63983	1.36636	2.08955	0.723422	0.723422
ZCN8 leaf 4	Platform 2014	-3.34399	0.580626	1.33304	3.50827	0.603156	0.603156
ZCN12 leaf 7	Platform 2014	-4.04582	0.669985	10.8881	12.9163	0.771267	0.771267
ZCN7 leaf 7	Platform 2014	-4.64437	0.203368	0.896965	10.8682	0.248192	0.248192
CONZ leaf 7	Platform 2014	-7.70015	0.122564	0.557983	4.7288	0.320646	0.320646
ZCN8 leaf 7	Platform 2015	-5.20429	0.467883	2.13585	2.46244	0.77626	0.77626
ZCN12 leaf 7	Platform 2015	-8.00762	0.337579	4.69664	10.8931	0.632978	0.632978
