# Supplementary material for: Maize adaptation across temperate climates was obtained via expression of two florigen genes
Source: PLoS Genet. 2020 Jul 16;16(7):e1008882. doi: 10.1371/journal.pgen.1008882 (PMC7386623; doi:10.1371/journal.pgen.1008882)
Supplement: S8 Table — (XLSX) [file pgen.1008882.s020.xlsx]

## Sheet: Feuil1
Oligo Name	Sequence 5' → 3'	Notes	Use
lcm116	AAAAAGCAGGCTTCACCATGTCTGATGTGGAGCCG	Forward oligo ZCN12	Cloning
lcm117	AGAAAGCTGGGTTTTACGAGCTCTCCGGCC	Reverse oligo ZCN12	Cloning
lcm118	AAAAAGCAGGCTTCACCATGTCAGCAACCGATCATTTG	Forward oligo ZCN8	Cloning
lcm119	AGAAAGCTGGGTTCTACTCTTCCCTAAACCTTC	Reverse oligo ZCN8	Cloning
art77	GGGGACAAGTTTGTACAAAAAAGCAGGCT	Gateway Adapter	Cloning
art78	GGGGACCACTTTGTACAAGAAAGCTGGGT	Gateway Adapter	Cloning
lcm154	GAGAGTAAGGCTAAAGTCGC	Forward oligo ZCN12	qPCR
lcm155	CCAACACATCTCGTATGA	Reverse oligo ZCN12	qPCR
Taqman Assay Name	Sequence 5' → 3'	Sequence 5' → 3'	Probe sequence	Fluorophore
ZCN12_NM_001112779	ACCAGCAATAACAAGCTA	CCAACACATCTCGTATGA	CAGCGGCTCCACATCAGACAT	FAM
ZNC8_NM_001112776	GGATGTATTGGATCCCTTTAC	GACTCGTGGTTTACTTACAA	CTCAGCACTTGGCAGAAGTAGCCTATT	FAM
ZCN7_NM_001112775	CTCAGTCCCATAGGGTTA	GTGGAATGGTTGGTGTAA	AGGACACGAGCCATAACCAA	TEX615
CONZ1_NM_001127250	GTGGCTATCACAGAGTTA	CTCCATTGACGATGAGAA	CAGGCTGCCTCCATGACTCC	FAM
EF1alpha_NM_001112	GTGTGAAGCAGATGATTTG	CAACCTTCTTCAGGTAGG	CTTCCTTCACAATCTCATCATAACG	HEX
GRBP2 EU955970	GTGTCGTGTTTGTTGTTG	GGATGAACACAGCACTAA	CTGACACAGAGCGACCTTGC	HEX
UCe-E2-17_EU966254	CCACCAAAGGTGTCTTTC	GACTCCACTGTTCCTTAA	CGAACATCAACAGCAACGGCAG	HEX
